# Supplementary material for: Minimum hyaluronic acid (HA) modified magnetic nanocrystals with less facilitated cancer migration and drug resistance for targeting CD44 abundant cancer cells by MR imaging
Source: Royal Society of Chemistry journal article supplement (doi:10.1039/c6tb02306a), 2017-01-01
Supplement: c6tb02306a1.pdf [file c6tb02306a1.pdf]

### Supporting Information

## Minimum Hyaluronic Acid (HA) Modified Magnetic Nanocrystals with Less Facilitated Cancer Migration and Drug Resistance for Targeting CD44 Abundant Cancer Cells by MR Imaging

Taeksu Lee<sup>a</sup>, Hye Young Son<sup>b</sup>, Yuna Choi<sup>b</sup>, Youngmin Shin<sup>b</sup>, Seungjae Oh<sup>c</sup>, Jinyoung Kim<sup>a</sup>, Yong-Min Huh<sup>b,c,\*</sup>, and Seungjoo Haam<sup>a,\*</sup>

<sup>a</sup> Department of Chemical and Biomolecular Engineering, Yonsei University, Seoul 120-749, South Korea

<sup>b</sup> Department of Radiology, College of Medicine, Yonsei University, Seoul 120-752, South Korea

<sup>c</sup> YUHS-KRIBB Medical Convergence Research Institute, Seoul 120-752, South Korea

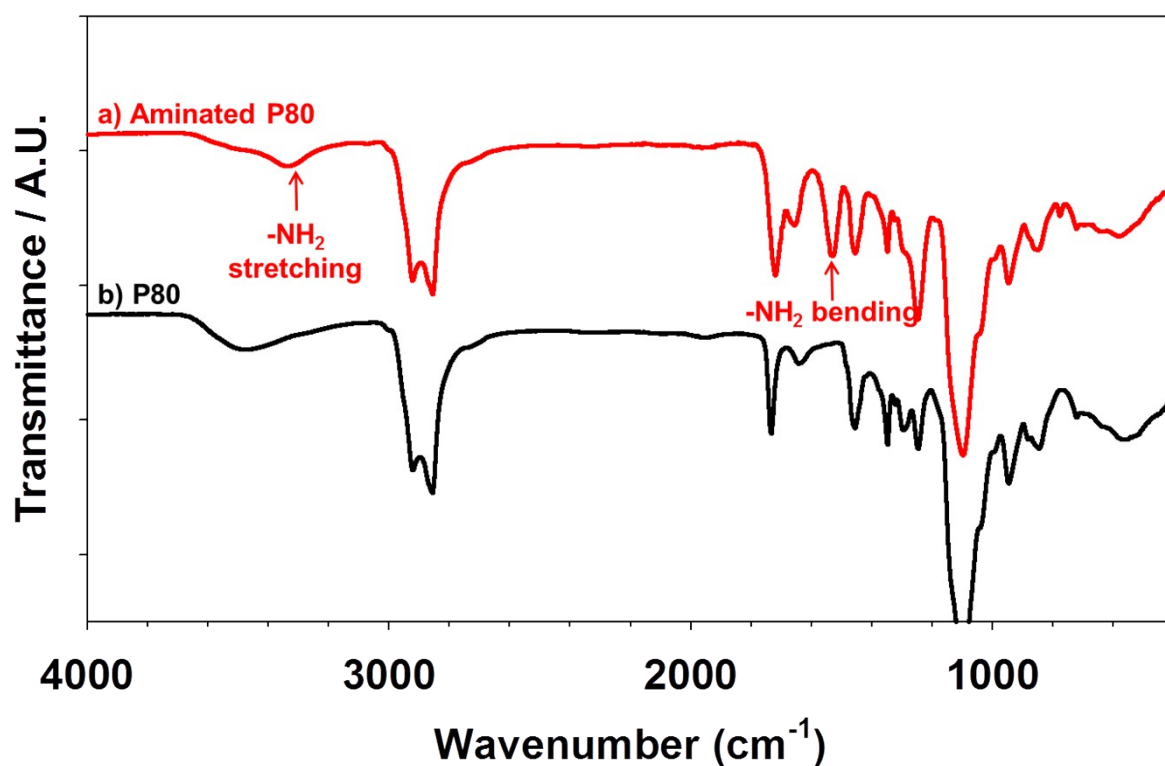

Figure S1. FT-IR spectra of a) aminated P80 (red line) and b) P80 (black line)

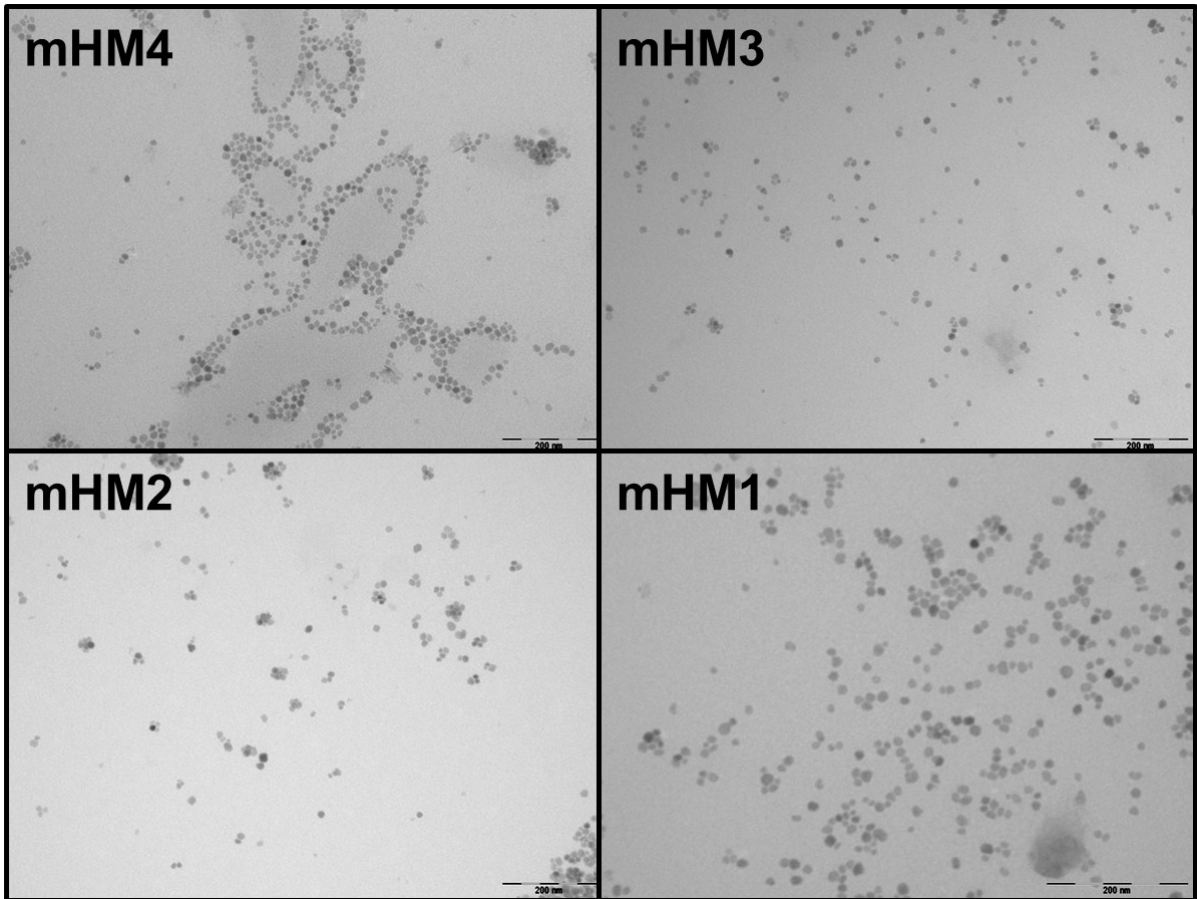

**Figure S2.** Representative TEM images of mHM 1,2,3,4.

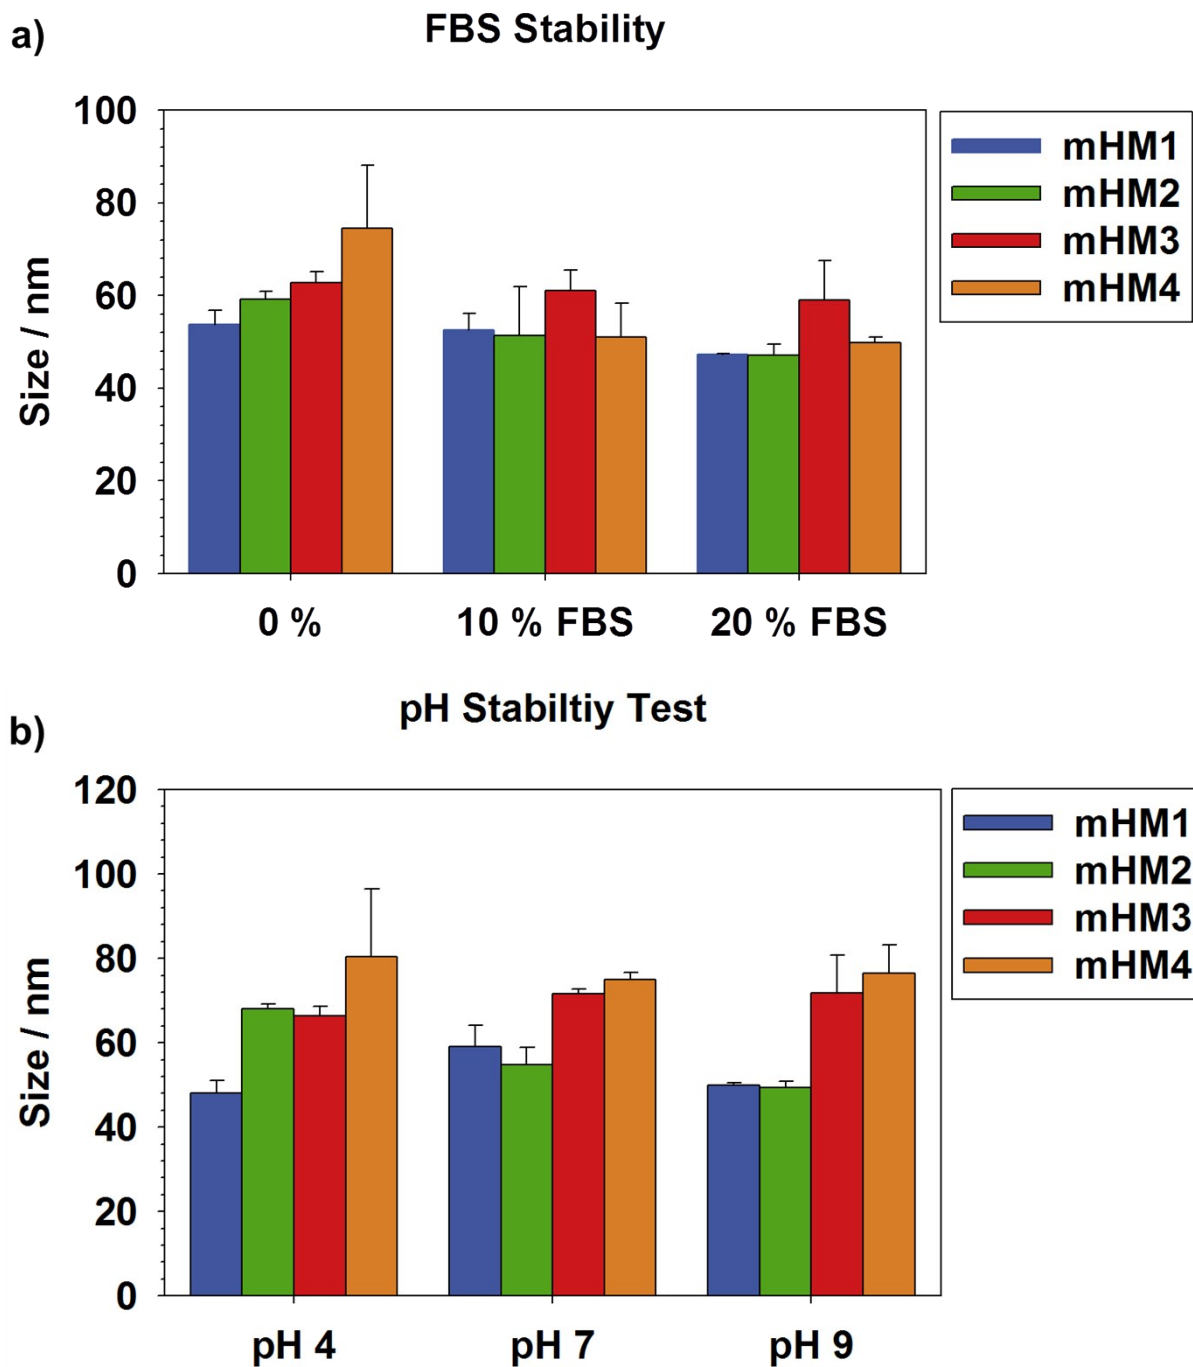

**Figure S3.** Colloidal stability of mHMs against a) various FBS concentrations (0%, 10%, and 20%) and different pH conditions (pH 4, 7, and 9) for 1 day at room temperature.

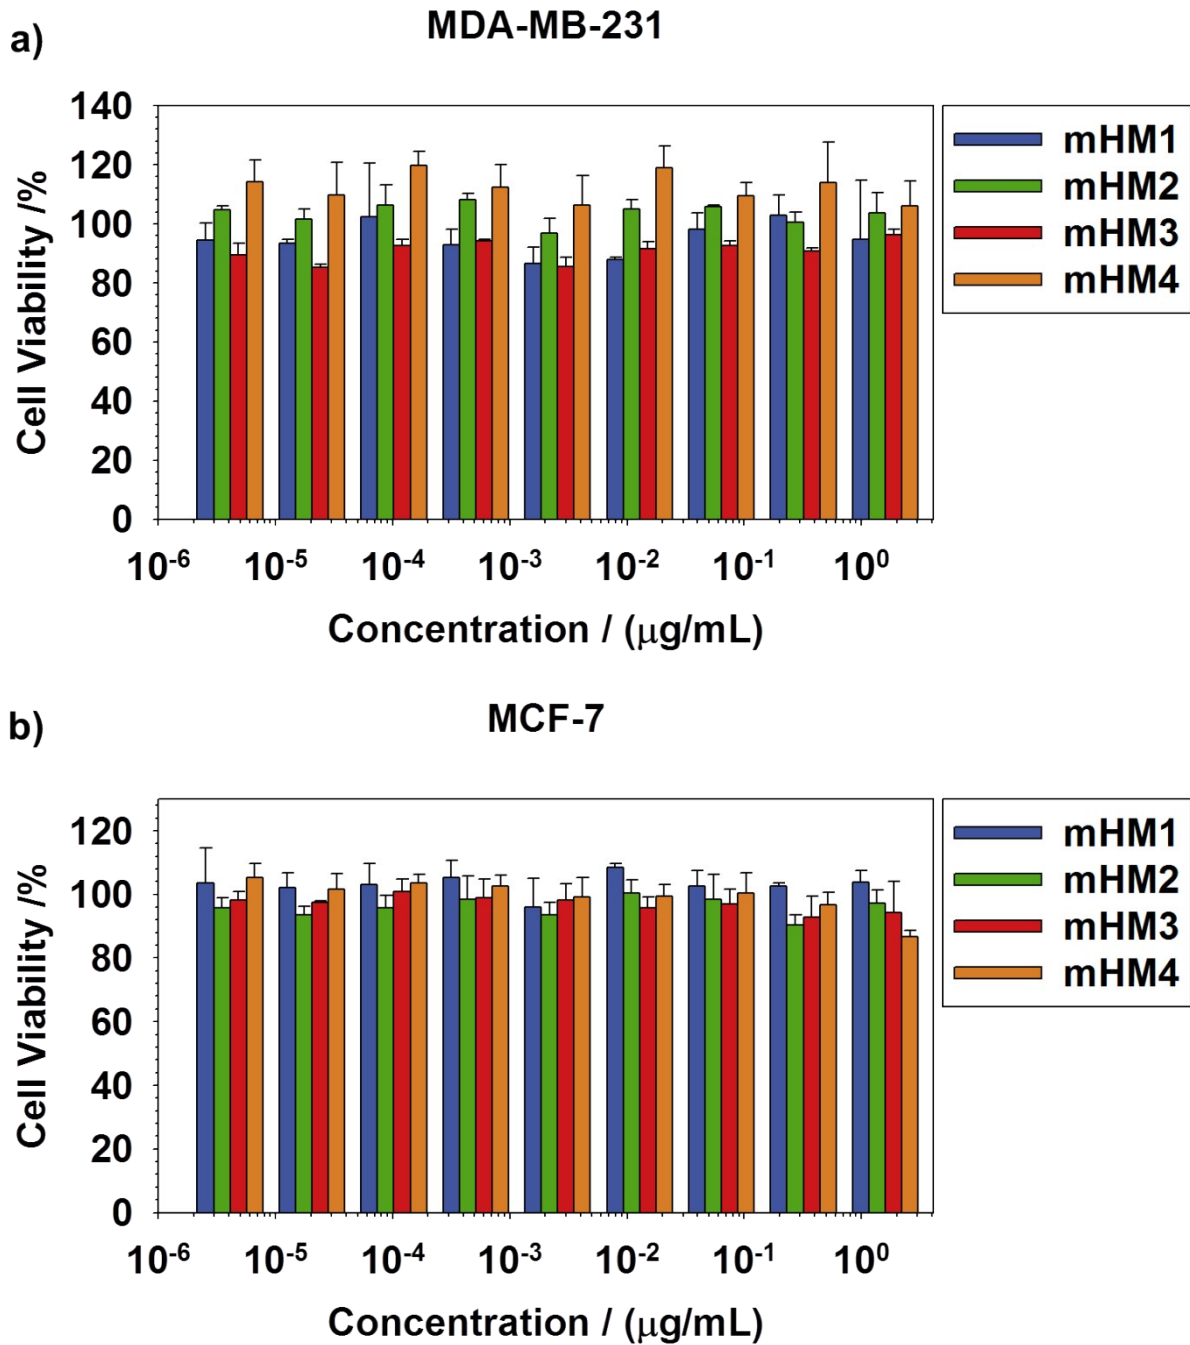

**Figure S4.** Cell viabilities of a) MDA-MB-231 cells and b) MCF-7 cells ( $1 \times 10^4$  cells each) after incubation with various concentrations of mHMs ( $4.1 \times 10^{-6} - 1.6 \mu\text{g/mL}$ ) for 1 day at  $37^\circ\text{C}$  in a 5%  $\text{CO}_2$  atmosphere using the 3-(4,5-dimethylthiazolyl-2)-2,5-diphenyltetrazolium bromide (MTT) assay.

5  $\mu\text{g}$

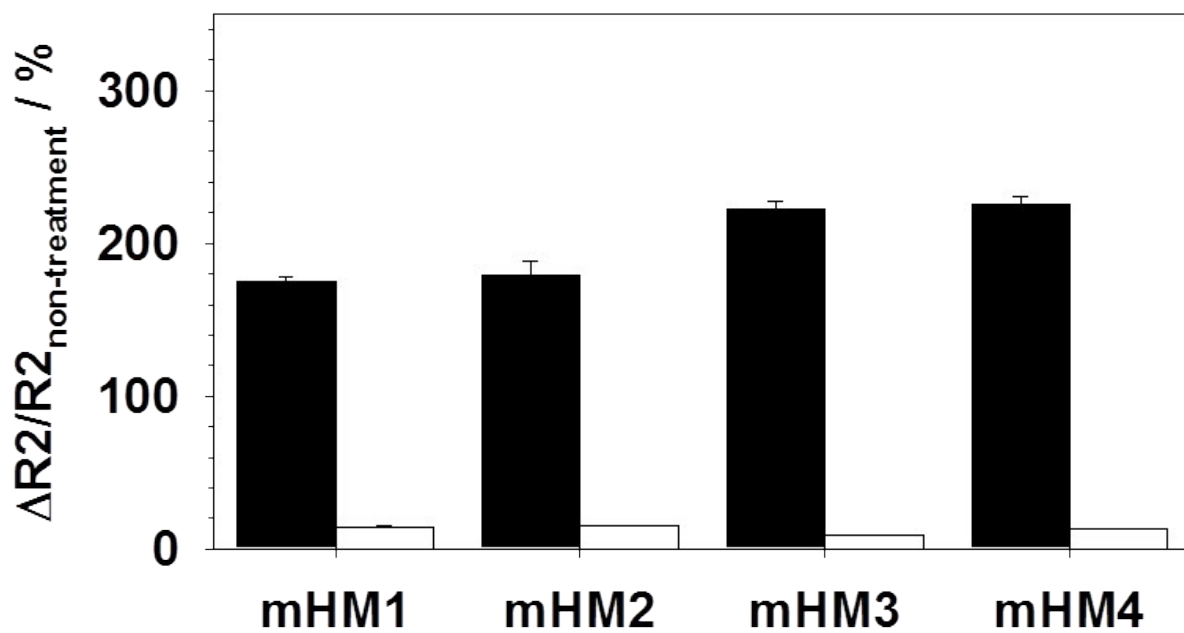

**Figure S5.**  $\Delta R_2/R_{2\text{non-treatment}}$  of MDA-MB-231 (black bar) and MFC-7 (white bar) after mHMs treatment at the 5  $\mu\text{g}$  metal (Fe + Mn) concentration.

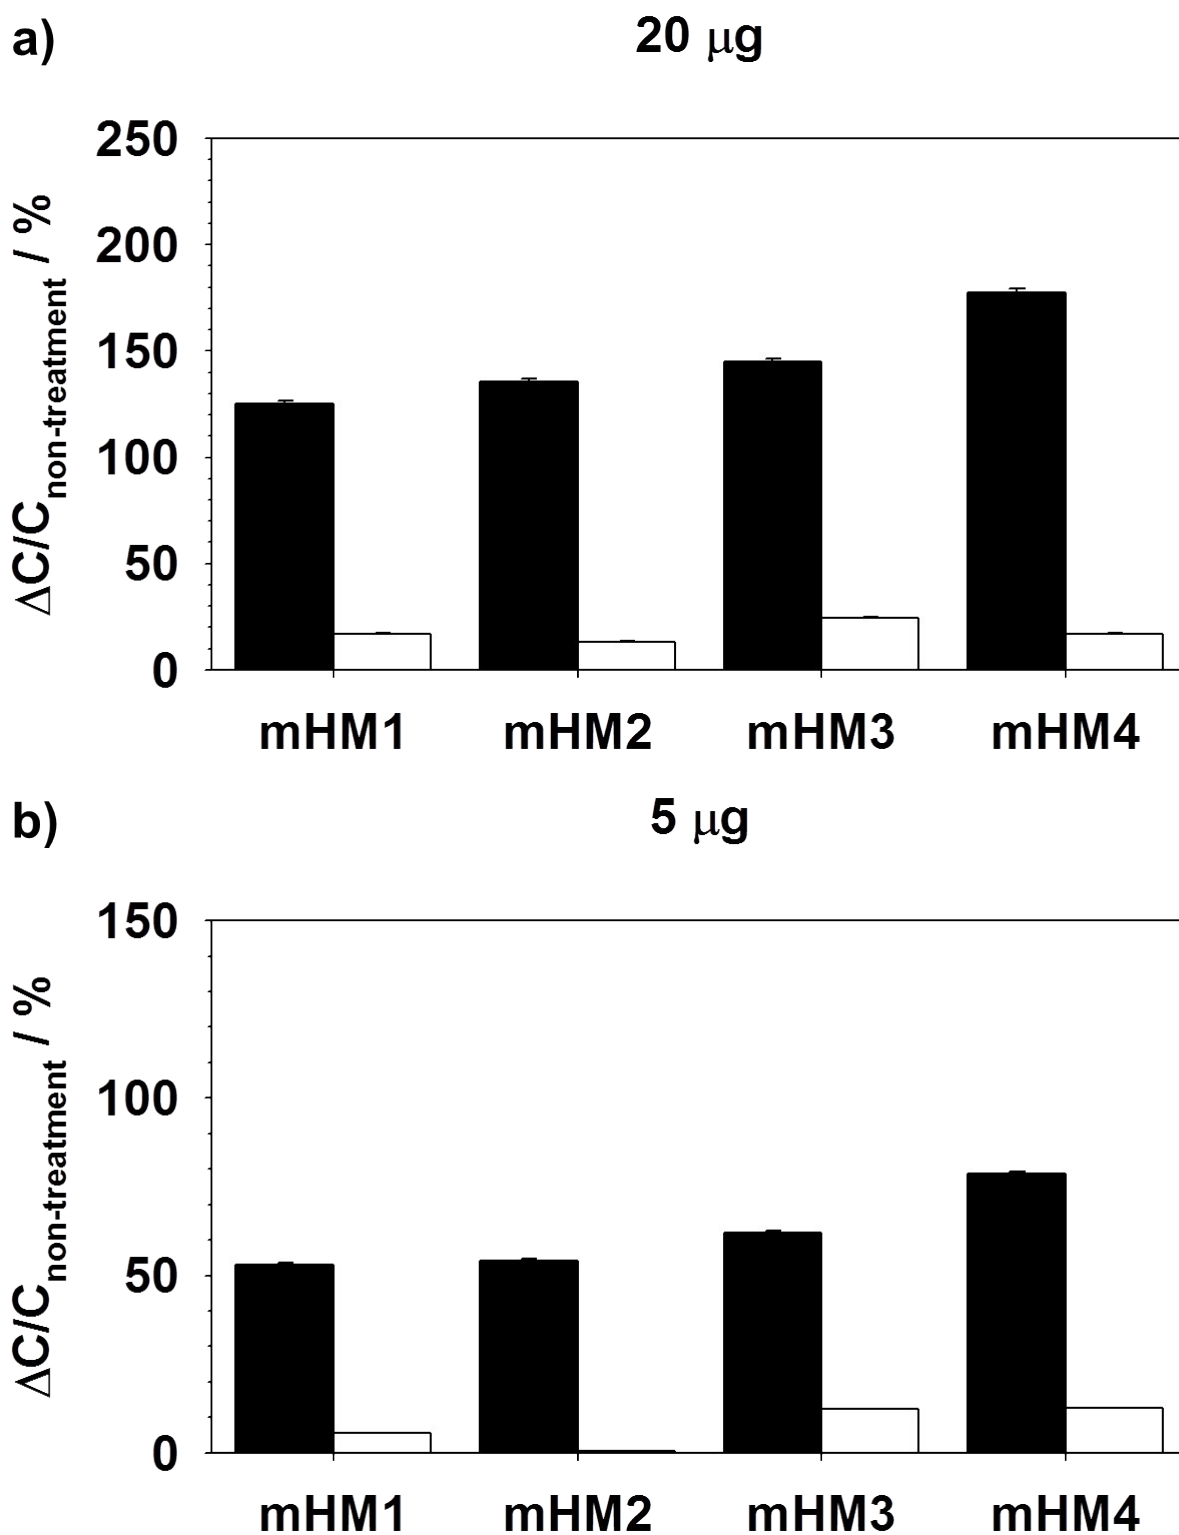

**Figure S6.**  $\Delta C/C_{\text{non-treatment}}$  of MDA-MB-231 (black bar) and MFC-7 (white bar) after mHMs treatment at a) 20 and b) 5  $\mu\text{g}$  metal (Fe + Mn) concentrations.

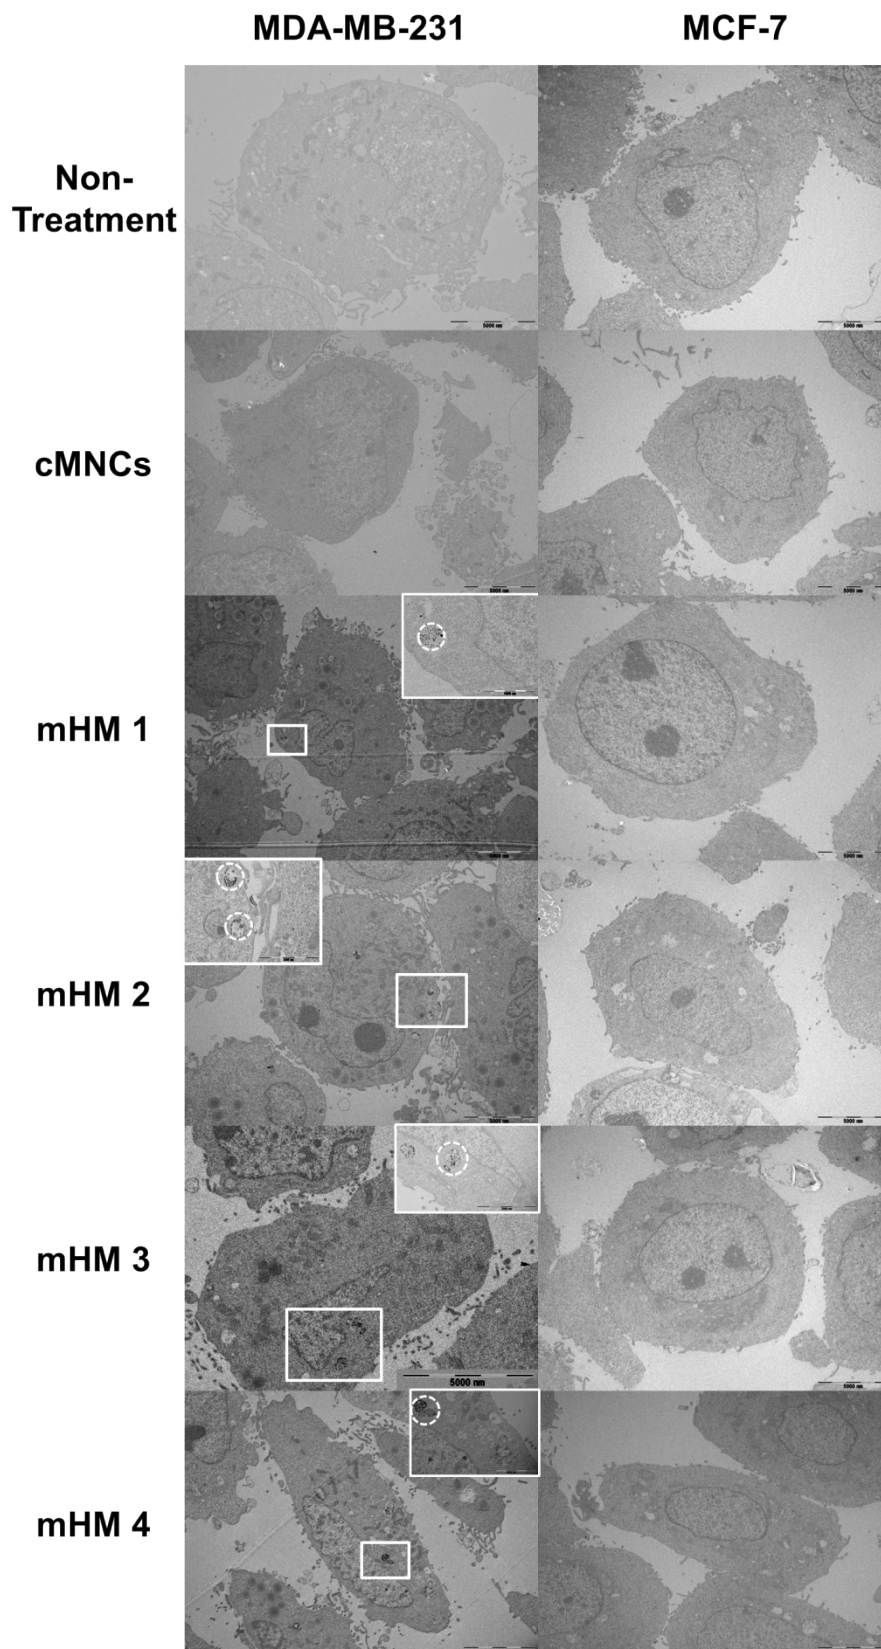

**Figure S7.** TEM image of MDA-MB-231 and MCF-7 cells incubated with cMNCs and mHMs (inset, magnification of the mHMs in the cytoplasm). The mHMs were internalized via receptor mediated endocytosis.

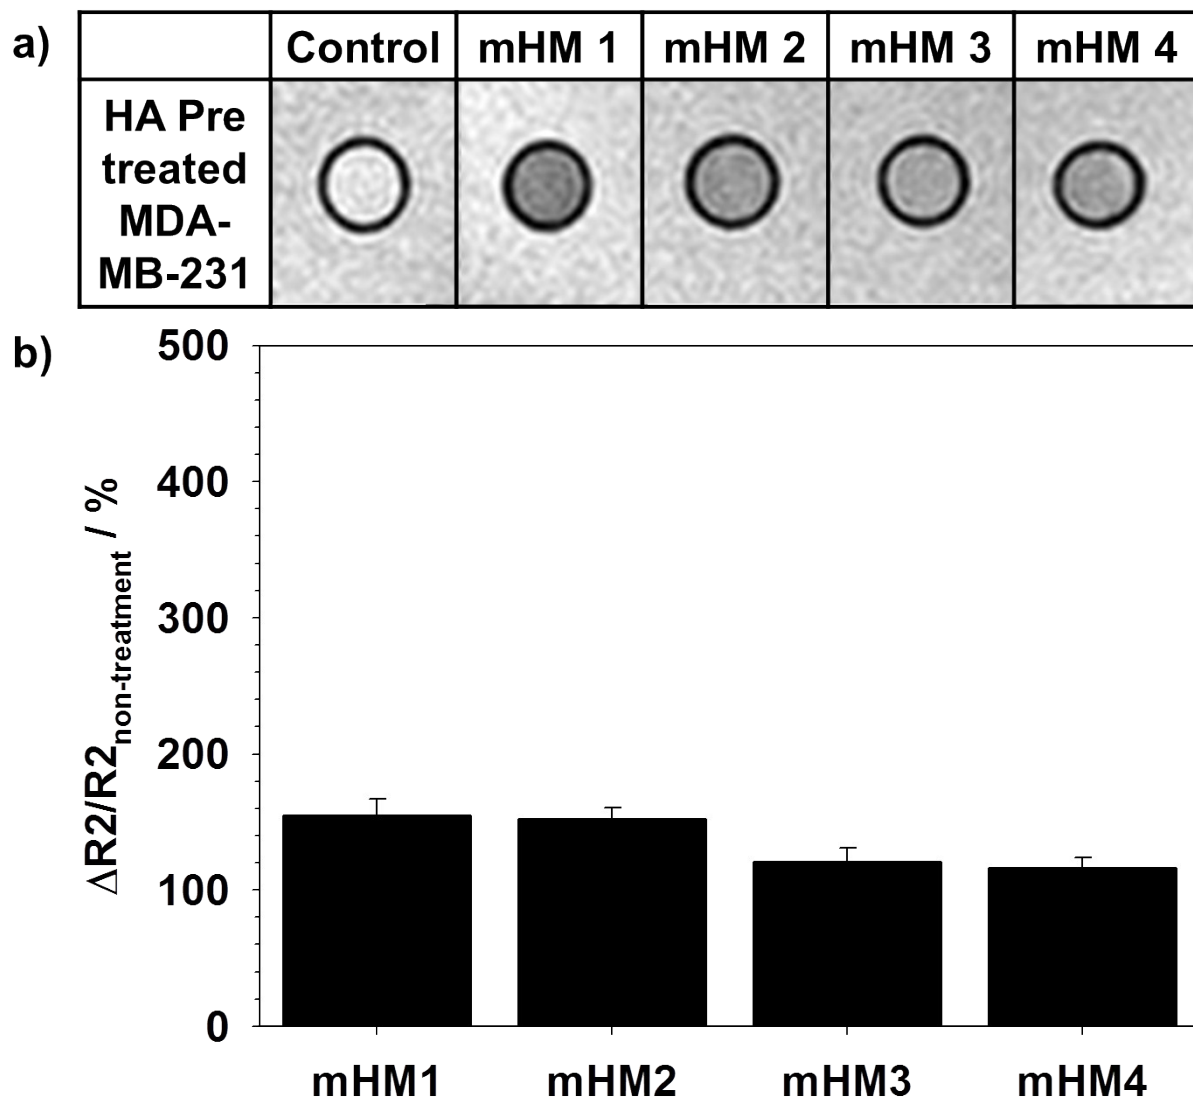

**Figure S8.** a)  $T_2$ -weighted MR images and b) The graph of  $\Delta R_2/R_{2\text{non-treatment}}$  of MDA-MB-231 cells after pre-incubation for 1 day with free HA (1 mg/mL) and treatment with 20  $\mu\text{g}$  of mHM1, 2, 3, 4 and non-treated cells.



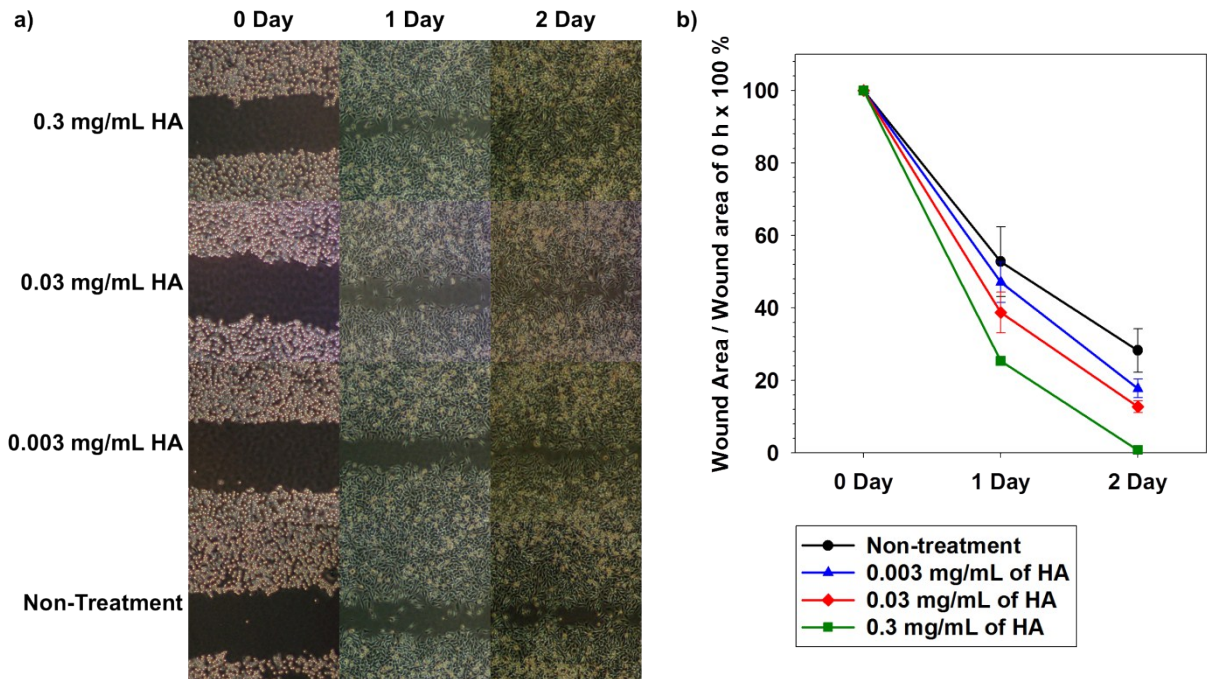

**Figure S9.** HA facilitated breast cancer cell migration. We performed a wound healing migration assay to determine the motility induction in various concentrations of HA (0.003 mg/mL - 0.3 mg/mL) treated and non-treated MDA-MB-231 cell lines. After seeding of  $1 \times 10^6$  cells, we wounded the cell monolayer using a sterile pipette tip and washed the cells with PBS. a) Thereafter, cells were photographed at 0, 1, and 2 days using a microscope (Olympus, Japan). b) Quantification was carried out by measuring the wound areas divided by wound area at 0 days.

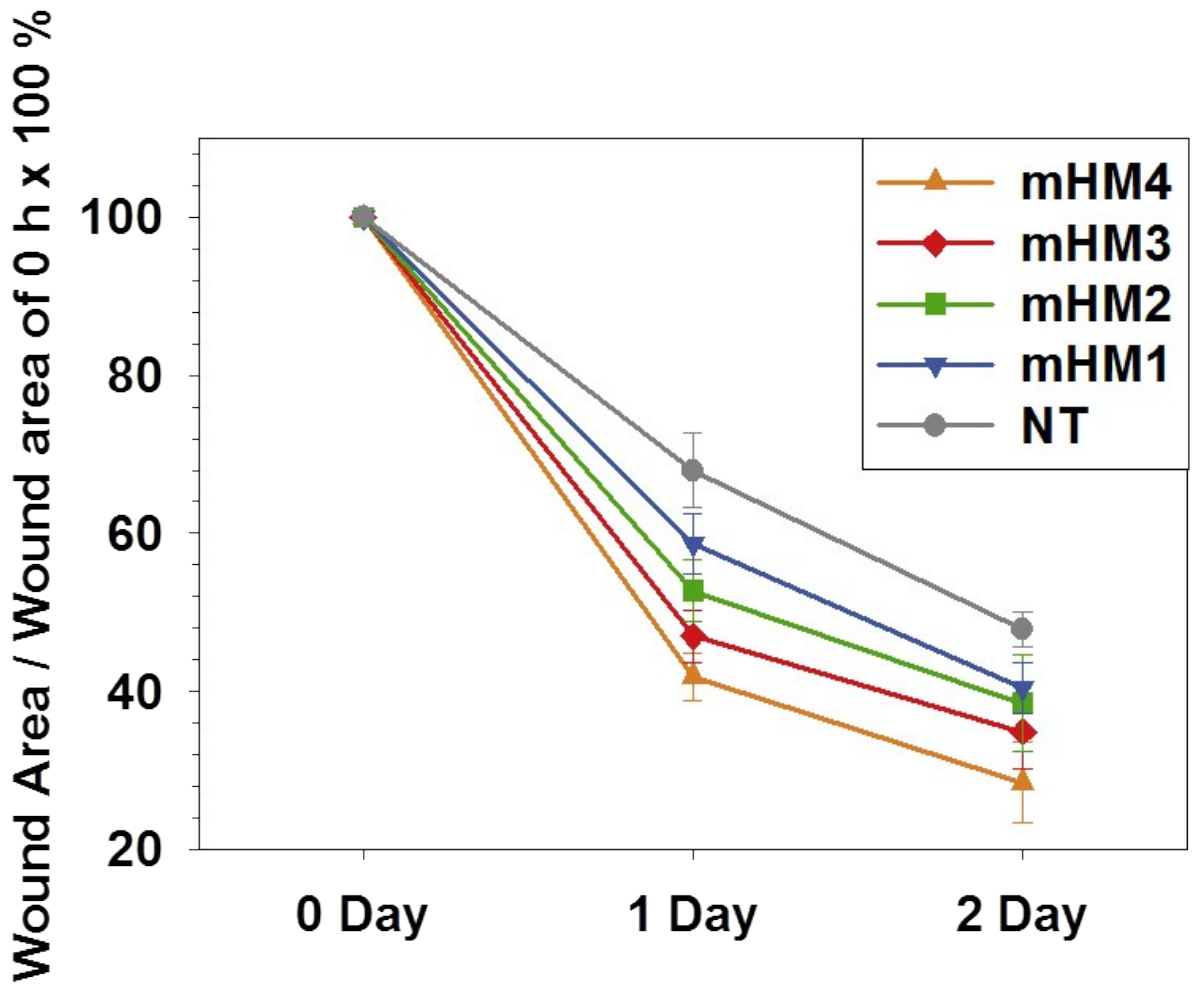

**Figure S10.** The relative ratio of wound closure per field. The greater the amount of HA conjugated, the faster the migration rate was confirmed. Non-treatment (gray); mHM1 (blue); mHM2 (green); mHM3 (red); mHM4 (orange).

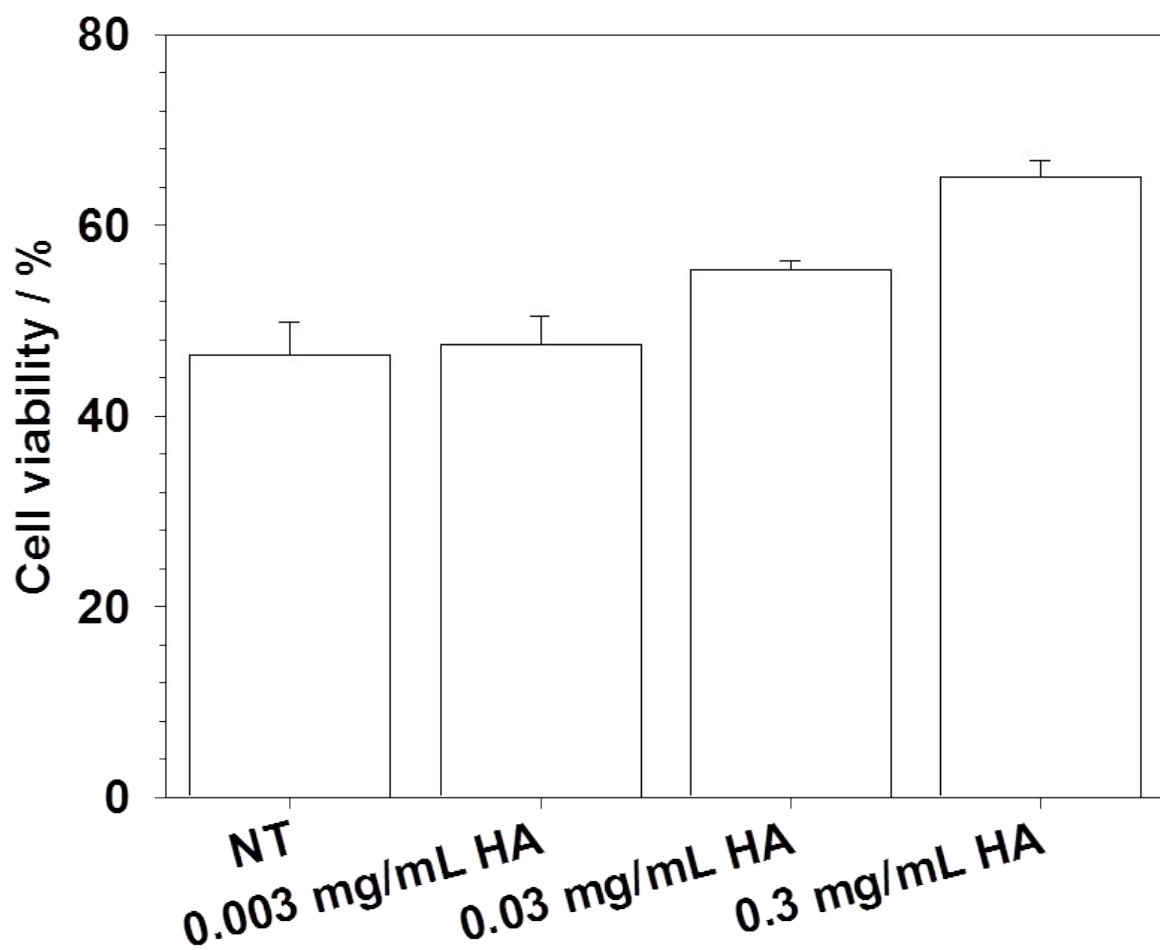

**Figure S11.** Cell viabilities of MDA-MB-231 cells after treatment with different concentrations of HA and non-treatment, as a control, followed by addition of 25  $\mu$ M doxorubicin. After 80 h, the percentages of live cells were analyzed by the MTT assay.

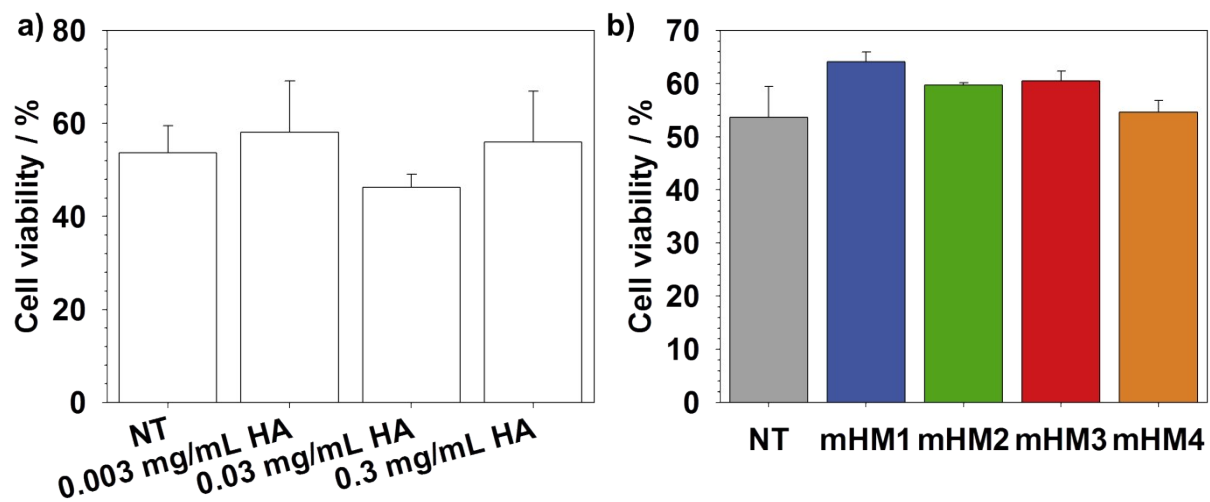

**Figure S12.** The cell viabilities of MCF-7 cells after treatment of a) different concentrations of HA, b) treatment of mHMs and non-treatment, as a control, followed by addition of 25  $\mu$ M of doxorubicin. After 80 h, the cell percentages of live cells were analyzed by MTT assay.

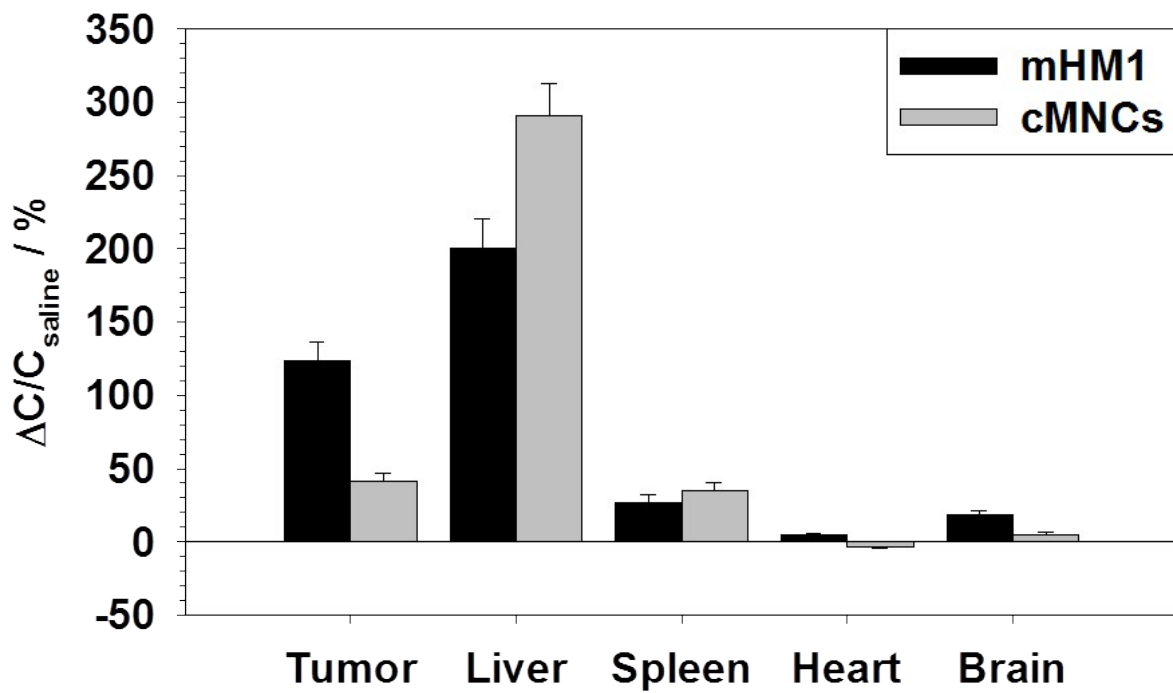

**Figure S13.** The relative magnetic ion concentrations (%) of bio-distributed mHM1 and cMNCs versus saline were measured based on the amount of MNCs (Fe+Mn) in the organs after treatment using inductively coupled plasma optical emission spectrometry (ICP-OES) analysis (error bars show standard deviation).
